# Supplementary material for: Bifidobacterial Dominance of the Gut in Early Life and Acquisition of Antimicrobial Resistance
Source: PubMed Central journal article supplement (PMC6158511; doi:10.1128/msphere.00441-18), 2018-09-26

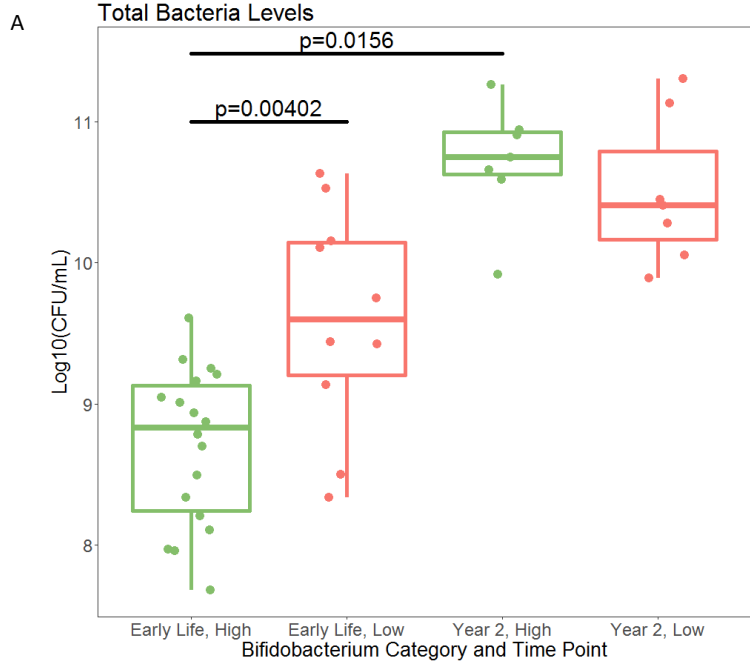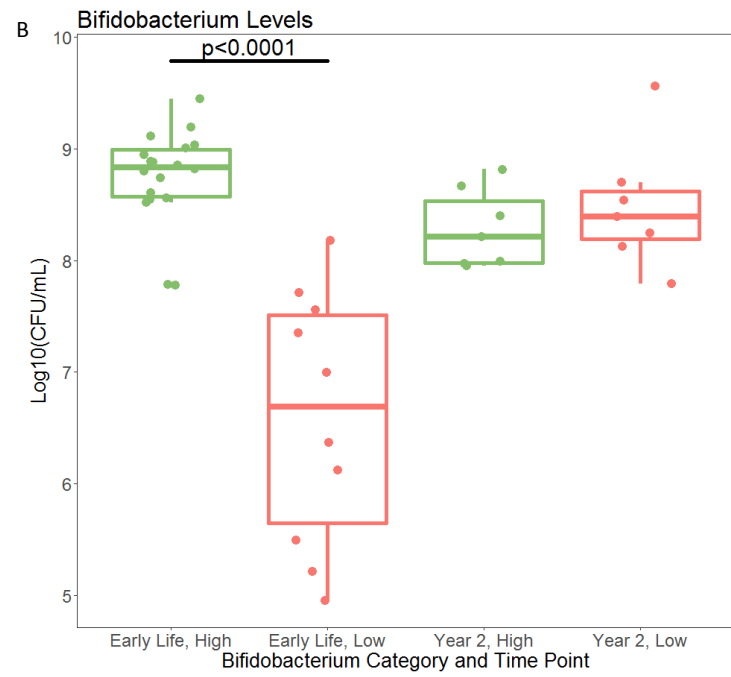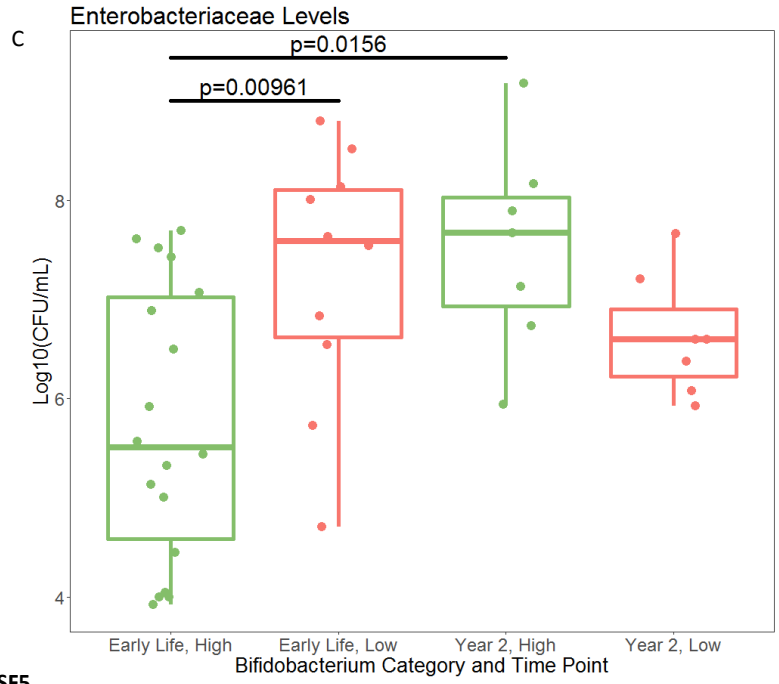

Supplement: sph005182646sf5.pdf [file sph005182646sf5.pdf]
