# Supplementary material for: Bifidobacterial Dominance of the Gut in Early Life and Acquisition of Antimicrobial Resistance
Source: PubMed Central journal article supplement (PMC6158511; doi:10.1128/msphere.00441-18), 2018-09-26
Supplement: sph005182646st1.pdf [file sph005182646st1.pdf]

| Sample Name | Run | Raw Reads | Non-Human Reads | Trimmed Reads | Merged Reads | Number of 16S Reads by METAXA2 | Number of ARGS by AMR++ | Number of Contigs | Total Length (bp) | N50 (bp) | Median Fold Coverage |
|-------------|-----|-----------|-----------------|---------------|--------------|--------------------------------|-------------------------|-------------------|-------------------|----------|----------------------|
| 1064w11     | 1   | 14380221  | 14334743        | 13315456      | 12636757     | 27217                          | 125267                  | 50127             | 61051555          | 2288     | 2.6                  |
| 1053w11     | 1   | 19629451  | 13661611        | 12710795      | 12219836     | 41588                          | 83246                   | 18082             | 29170214          | 588      | 3.4                  |
| 1063w11     | 1   | 17378110  | 17362608        | 16081929      | 14995458     | 51707                          | 66697                   | 47426             | 60953333          | 2162     | 2.6                  |
| 1076w11     | 1   | 15183617  | 15028195        | 14096572      | 13662359     | 35623                          | 54376                   | 35061             | 34487584          | 1861     | 2.1                  |
| 2055w11     | 1   | 20591207  | 20289114        | 18959385      | 17691644     | 45367                          | 20715                   | 16566             | 20554102          | 1686     | 2.9                  |
| 2056w11     | 1   | 17851881  | 17842489        | 16753754      | 15467766     | 39764                          | 20528                   | 3649              | 5874235           | 110      | 3.1                  |
| 2058w11     | 1   | 17536887  | 17075871        | 15348380      | 13232359     | 30079                          | 22278                   | 9453              | 20405925          | 127      | 3.3                  |
| 1068w11     | 1   | 22948608  | 22937547        | 21340052      | 17711835     | 39130                          | 17781                   | 12990             | 16190699          | 1585     | 2.4                  |
| 2053w11     | 1   | 17300496  | 17279551        | 16216059      | 15230690     | 38536                          | 30236                   | 21226             | 23308243          | 940      | 2.4                  |
| 1065w15     | 1   | 17084988  | 17060815        | 16132190      | 15703015     | 33157                          | 22476                   | 24657             | 15976762          | 5869     | 3.8                  |
| 1073w11     | 1   | 19539299  | 19523131        | 17845554      | 16912413     | 42543                          | 7896                    | 6690              | 6467660           | 702      | 3.1                  |
| 2057w11     | 1   | 23762708  | 23735806        | 21917539      | 18864612     | 41789                          | 29713                   | 6878              | 15681795          | 205      | 2.8                  |
| 3003w15     | 1   | 19611190  | 19583188        | 18284763      | 17640081     | 41146                          | 10401                   | 20612             | 14146450          | 3934     | 2.3                  |
| 3015w15     | 1   | 24580377  | 24539514        | 23196783      | 22504680     | 42133                          | 66358                   | 15988             | 16213571          | 1061     | 2.3                  |
| 3016w15     | 1   | 25128737  | 21614107        | 19722233      | 18472920     | 46586                          | 158941                  | 35815             | 66449697          | 1449     | 4.4                  |
| 3112w6      | 2   | 13672450  | 13664712        | 12765848      | 12301455     | 28206                          | 11725                   | 35487             | 58153682          | 1457     | 3.1                  |
| 3047w6      | 2   | 24580990  | 24536103        | 21607252      | 16643043     | 44571                          | 32986                   | 7221              | 15639390          | 95       | 2.4                  |
| 3113w6      | 2   | 14904714  | 14836311        | 13968692      | 13355094     | 28575                          | 174261                  | 26901             | 33982241          | 606      | 3.4                  |
| 3084w6      | 2   | 18577575  | 18568806        | 16885262      | 14693982     | 33654                          | 10113                   | 16156             | 21241431          | 1217     | 3.6                  |
| 3032w6      | 2   | 20735595  | 20686340        | 17749861      | 14342661     | 28429                          | 43880                   | 25420             | 43572967          | 422      | 2.6                  |
| 3060w6      | 2   | 17859309  | 17845300        | 15896252      | 13750615     | 35381                          | 56254                   | 11625             | 15900095          | 566      | 2.8                  |
| 1089w6      | 2   | 16390946  | 16380210        | 14971412      | 11494270     | 18592                          | 5808                    | 20360             | 62273104          | 292      | 2.9                  |
| 3073w6      | 2   | 19683953  | 19636243        | 17876558      | 13600319     | 33139                          | 15030                   | 7344              | 10708874          | 106      | 2.4                  |
| 1055w6      | 2   | 15120882  | 15077876        | 13950310      | 13292318     | 23214                          | 6089                    | 6735              | 12770225          | 216      | 3.2                  |
| 3034w6      | 2   | 21366435  | 20788378        | 18196493      | 13428885     | 46111                          | 66789                   | 39406             | 69214072          | 1116     | 2.8                  |
| 1026w6      | 2   | 20953772  | 20918779        | 18574136      | 14147259     | 33159                          | 287176                  | 22061             | 34698627          | 1685     | 3.5                  |
| 1108w6      | 2   | 19746073  | 18583770        | 16849105      | 12615808     | 46164                          | 60155                   | 32133             | 55534922          | 1470     | 3.0                  |

|        |   |          |          |          |          |       |       |        |           |       |     |
|--------|---|----------|----------|----------|----------|-------|-------|--------|-----------|-------|-----|
| 2085w6 | 2 | 17747630 | 17466203 | 15966043 | 14070444 | 55386 | 14429 | 35964  | 51631713  | 1961  | 3.6 |
| 1078w6 | 2 | 20863345 | 20845831 | 18501901 | 14943498 | 37023 | 11505 | 9418   | 7550175   | 948   | 2.2 |
| 1067w6 | 2 | 25835804 | 25715076 | 22993270 | 17211115 | 40940 | 17625 | 5935   | 12125208  | 263   | 4.4 |
| 2003w6 | 2 | 22693868 | 22592569 | 19877432 | 15721450 | 42391 | 21396 | 15715  | 18037980  | 1246  | 2.7 |
| 3112Y2 | 3 | 15915495 | 15894931 | 15223603 | 15079932 | 39667 | 8482  | 111564 | 103013982 | 10894 | 2.7 |
| 3047Y2 | 3 | 18140211 | 18117511 | 17234928 | 17010066 | 41833 | 85055 | 194976 | 195010593 | 15389 | 2.8 |
| 3113Y2 | 3 | 20676570 | 20652394 | 19697279 | 19315250 | 47016 | 19077 | 90188  | 89601018  | 7942  | 2.7 |
| 3084Y2 | 3 | 23071393 | 23054841 | 21776412 | 20414487 | 53136 | 17249 | 129155 | 134064923 | 10109 | 2.9 |
| 3032Y2 | 3 | 16955520 | 16925521 | 15990438 | 15596045 | 53981 | 36658 | 157385 | 182063022 | 11466 | 3.0 |
| 3060Y2 | 3 | 17473920 | 16271611 | 15486962 | 15024539 | 50609 | 35666 | 119015 | 130634566 | 9711  | 3.1 |
| 1089Y2 | 3 | 16735419 | 16724259 | 15781718 | 15074732 | 45944 | 13276 | 222477 | 230296407 | 22196 | 3.0 |
| 3073Y2 | 3 | 18772114 | 18754532 | 17938554 | 17544385 | 47704 | 31636 | 144553 | 172559452 | 10106 | 2.9 |
| 1055Y2 | 3 | 17137212 | 17124183 | 16114914 | 15740123 | 51409 | 26164 | 231719 | 221387099 | 25152 | 2.8 |
| 3034Y2 | 3 | 18472422 | 18463327 | 17729658 | 17441432 | 42699 | 18544 | 75729  | 75170747  | 6029  | 2.7 |
| 1026Y2 | 3 | 16271657 | 16262006 | 15619917 | 15387886 | 45703 | 8510  | 45972  | 78724028  | 1090  | 2.6 |
| 1108Y2 | 3 | 18770895 | 16968867 | 16255801 | 16029212 | 52904 | 40721 | 106673 | 109260311 | 9722  | 3.0 |
| 2085Y2 | 3 | 17103018 | 16605614 | 15854678 | 15448880 | 63791 | 14623 | 82184  | 96467510  | 5770  | 3.1 |
| 1078Y2 | 3 | 13743837 | 13736308 | 13066373 | 12641209 | 37407 | 9706  | 72437  | 83115888  | 5148  | 2.8 |
| 1067Y2 | 3 | 15417592 | 15400700 | 14669310 | 13838867 | 34455 | 38958 | 123940 | 138911813 | 10522 | 2.7 |

**Supplemental Table S1**
