# Supplementary material for: Bifidobacterial Dominance of the Gut in Early Life and Acquisition of Antimicrobial Resistance
Source: PubMed Central journal article supplement (PMC6158511; doi:10.1128/msphere.00441-18), 2018-09-26
Supplement: sph005182646st2.pdf [file sph005182646st2.pdf]

| Resistance Class | High <i>Bifidobacterium</i> samples<br>n=18 | Low <i>Bifidobacterium</i> samples<br>n=13 |
|------------------|---------------------------------------------|--------------------------------------------|
| Aminoglycoside   | 9                                           | 11                                         |
| Beta-lactam      | 10                                          | 12                                         |
| Fluoroquinolone  | 4                                           | 10                                         |
| Fosfomycin       | 3                                           | 6                                          |
| Glycopeptide     | 0                                           | 2                                          |
| MLS              | 18                                          | 13                                         |
| Nitroimidazole   | 0                                           | 1                                          |
| Phenicol         | 5                                           | 5                                          |
| Sulphonamide     | 6                                           | 11                                         |
| Tetracycline     | 16                                          | 13                                         |
| Trimethoprim     | 7                                           | 9                                          |

**Supplemental Table S2**
