# Supplementary material for: Bifidobacterial Dominance of the Gut in Early Life and Acquisition of Antimicrobial Resistance
Source: PubMed Central journal article supplement (PMC6158511; doi:10.1128/msphere.00441-18), 2018-09-26
Supplement: sph005182646st3.pdf [file sph005182646st3.pdf]

| Class                           | Mechanism                                    | Group | Gene                                                                                                                |
|---------------------------------|----------------------------------------------|-------|---------------------------------------------------------------------------------------------------------------------|
| Aminocoumarins                  | Aminocoumarin-resistant DNA topoisomerases   | PARE  | None                                                                                                                |
| Aminoglycosides                 | Aminoglycoside efflux pumps                  | ACRD  | None                                                                                                                |
|                                 | Aminoglycoside efflux regulator              | None  | None                                                                                                                |
| Bacitracin                      | Undecaprenyl pyrophosphate phosphatase       | BACA  | None                                                                                                                |
| Beta-lactams                    | Class A beta-lactamases                      | CTX   | 1268 AB976602.1 AB976602 beta-lactams Class_A_beta-lactamases CTX                                                   |
|                                 | Penicillin binding protein                   | AMPH  | None                                                                                                                |
| Cationic antimicrobial peptides | None                                         | None  | None                                                                                                                |
| Efamycins                       | EF-Tu inhibition                             | TUFAB | CARD pvgb AE014075 3901532-3902762 ARO:3003438 Escherichia Efamycins EF-Tu_inhibition TUFAB RequiresSNPConfirmation |
|                                 |                                              |       | CARD pvgb CP000647 4764664-4765849 ARO:3001312 elfamycin Efamycins EF-Tu_inhibition TUFAB RequiresSNPConfirmation   |
| Fluoroquinolones                | Fluoroquinolone-resistant DNA topoisomerases | PARC  | None                                                                                                                |
|                                 |                                              | GYRB  | None                                                                                                                |
|                                 |                                              | GYRA  | None                                                                                                                |
| MLS                             | 23S rRNA methyltransferases                  | ERMX  | CARD phgb AF024666 2207-2969 ARO:3000596 ErmX MLS 23S_rRNA_methyltransferases ERMX                                  |
|                                 |                                              |       | MLS ermX_3_U21300 MLS 23S_rRNA_methyltransferases ERMX                                                              |
|                                 |                                              |       | MLS ermX_2_X51472 MLS 23S_rRNA_methyltransferases ERMX                                                              |
|                                 |                                              |       | MLS ErmX M36726 296-1150 855 MLS 23S_rRNA_methyltransferases ERMX                                                   |
| Multi-drug resistance           | MDR mutant porin proteins                    | OMPF  | None                                                                                                                |
|                                 | MDR regulator                                | MARR  | None                                                                                                                |
|                                 |                                              | HNS   | CARD phgb NC_002695 1737553-1737967 ARO:3000676 H-NS Multi-                                                         |

|              |                                                        |       |                                                                                            |
|--------------|--------------------------------------------------------|-------|--------------------------------------------------------------------------------------------|
|              |                                                        |       | drug_resistance MDR_regulator HNS                                                          |
|              |                                                        | EVGA  | None                                                                                       |
|              |                                                        | CRP   | CARD phgb AP009048 4153663-4154296 ARO:3000518 CRP Multi-drug_resistance MDR_regulator CRP |
|              |                                                        | CPXAR | None                                                                                       |
|              |                                                        | CPXA  | None                                                                                       |
|              |                                                        | BAER  | None                                                                                       |
|              |                                                        | ASMA  | None                                                                                       |
|              | Multi-drug efflux pumps                                | ACRB  | 11 DQ679966.1 DQ679966 Multi-drug_resistance Multi-drug_efflux_pumps ACRB                  |
|              |                                                        | MDTB  | None                                                                                       |
|              |                                                        | EMRR  | None                                                                                       |
|              |                                                        | EMRK  | None                                                                                       |
|              |                                                        | EMRD  | None                                                                                       |
|              |                                                        | EMRB  | None                                                                                       |
| Rifampin     | Rifampin-resistant beta-subunit of RNA polymerase RpoB | RPOB  | None                                                                                       |
| Sulfonamides | Sulfonamide-resistant dihydropteroate synthases        | FOLP  | None                                                                                       |

Supplemental Table S3
