# Supplementary material for: Bifidobacterial Dominance of the Gut in Early Life and Acquisition of Antimicrobial Resistance
Source: PubMed Central journal article supplement (PMC6158511; doi:10.1128/msphere.00441-18), 2018-09-26
Supplement: sph005182646st4.pdf [file sph005182646st4.pdf]

| Subject Number | Run Accession | Month | Raw Reads | Non-Human Reads | Trimmed Reads | Number of 16S Reads by METAXA2 | Number of ARGS by AMR++ |
|----------------|---------------|-------|-----------|-----------------|---------------|--------------------------------|-------------------------|
| 1              | ERR525721     | 4     | 25194766  | 25194552        | 12284258      | 16318                          | 31746                   |
| 7              | ERR526069     | 4     | 14665521  | 14665409        | 4977246       | 11466                          | 191452                  |
| 9              | ERR526085     | 4     | 24636188  | 24636016        | 12284893      | 21081                          | 367866                  |
| 10             | ERR525693     | 4     | 21754446  | 21754303        | 12746631      | 20233                          | 87199                   |
| 12             | ERR525702     | 4     | 17001574  | 16952581        | 10338601      | 17225                          | 173217                  |
| 18             | ERR525750     | 4     | 18834353  | 18834258        | 7024546       | 13249                          | 58704                   |
| 26             | ERR525805     | 4     | 16814591  | 16814408        | 4189035       | 11803                          | 59742                   |
| 38             | ERR525885     | 4     | 18764372  | 18763798        | 8296093       | 14406                          | 137641                  |
| 39             | ERR525897     | 4     | 20399449  | 20398301        | 8642293       | 14126                          | 209450                  |
| 42             | ERR525905     | 4     | 20194674  | 20194259        | 10242776      | 8115                           | 75616                   |
| 45             | ERR525909     | 4     | 22106860  | 22106766        | 14622027      | 17595                          | 54207                   |
| 51             | ERR525929     | 4     | 22462043  | 22461830        | 14022419      | 17994                          | 41987                   |
| 53             | ERR525949     | 4     | 24742763  | 24742484        | 15056810      | 22842                          | 308837                  |
| 70             | ERR526065     | 4     | 22383268  | 22383147        | 10490163      | 15785                          | 11057                   |
| 78             | ERR526071     | 4     | 26377908  | 26377742        | 12932816      | 16593                          | 122841                  |
| 82             | ERR526077     | 4     | 17592983  | 17592362        | 11295251      | 14278                          | 21032                   |
| 87             | ERR526081     | 4     | 29211695  | 29211122        | 18303370      | 31011                          | 237214                  |
| 103            | ERR525690     | 4     | 16231842  | 16230748        | 7207270       | 15467                          | 134221                  |
| 105            | ERR525695     | 4     | 17722853  | 17719545        | 6744742       | 14664                          | 139598                  |
| 128            | ERR525704     | 4     | 19819050  | 19815942        | 11091745      | 21103                          | 247666                  |
| 130            | ERR525710     | 4     | 23491541  | 23491367        | 11362899      | 18640                          | 251207                  |
| 133            | ERR525714     | 4     | 18694275  | 18693885        | 9435111       | 16963                          | 63842                   |
| 137            | ERR525718     | 4     | 20649572  | 20649468        | 9538590       | 10949                          | 21838                   |
| 150            | ERR525723     | 4     | 23589204  | 23588970        | 15184081      | 21618                          | 35737                   |
| 157            | ERR525727     | 4     | 24786867  | 24783121        | 15834911      | 25994                          | 55010                   |
| 172            | ERR525731     | 4     | 20565027  | 20563964        | 13904636      | 23956                          | 67054                   |
| 179            | ERR525735     | 4     | 24354870  | 24354505        | 15227890      | 18334                          | 26179                   |
| 180            | ERR525739     | 4     | 21734489  | 21734306        | 13699461      | 21507                          | 83768                   |

|     |           |   |          |          |          |       |        |
|-----|-----------|---|----------|----------|----------|-------|--------|
| 181 | ERR525744 | 4 | 18075345 | 18074795 | 6946877  | 12770 | 77558  |
| 184 | ERR525748 | 4 | 15554285 | 15554204 | 4195449  | 5678  | 1499   |
| 195 | ERR525755 | 4 | 16983205 | 16983132 | 6263191  | 7947  | 18274  |
| 201 | ERR525761 | 4 | 15747516 | 15744159 | 5004689  | 10920 | 95565  |
| 203 | ERR525765 | 4 | 13432721 | 13432235 | 3832479  | 8203  | 14330  |
| 224 | ERR525769 | 4 | 18007748 | 18007676 | 8551124  | 9339  | 49572  |
| 229 | ERR525773 | 4 | 16364265 | 16355319 | 4296653  | 7820  | 152211 |
| 238 | ERR525777 | 4 | 13481397 | 13472907 | 4613277  | 10398 | 7839   |
| 240 | ERR525781 | 4 | 13584665 | 13584303 | 5241981  | 6122  | 97153  |
| 241 | ERR525785 | 4 | 20217874 | 20216782 | 7036977  | 8552  | 16134  |
| 244 | ERR525789 | 4 | 15424240 | 15423978 | 3884723  | 5216  | 10403  |
| 256 | ERR525793 | 4 | 17656215 | 17636264 | 3609736  | 9898  | 137870 |
| 258 | ERR525797 | 4 | 20378830 | 20378661 | 8399971  | 10162 | 280996 |
| 263 | ERR525802 | 4 | 21101296 | 21101217 | 7684060  | 5955  | 23441  |
| 265 | ERR525807 | 4 | 19356333 | 19354945 | 3165935  | 6168  | 129766 |
| 268 | ERR525811 | 4 | 25236501 | 25235234 | 16845025 | 26285 | 92579  |
| 272 | ERR525817 | 4 | 28617163 | 28278056 | 21133001 | 25257 | 32332  |
| 274 | ERR525821 | 4 | 22950635 | 22950538 | 10795482 | 9329  | 121757 |
| 275 | ERR525825 | 4 | 14749523 | 14748277 | 3915596  | 11161 | 50209  |
| 276 | ERR525829 | 4 | 18894693 | 18893873 | 9214328  | 16380 | 110532 |
| 281 | ERR525833 | 4 | 20793881 | 20793458 | 12325290 | 26301 | 35660  |
| 282 | ERR525837 | 4 | 18562146 | 18560671 | 8174618  | 18686 | 29345  |
| 326 | ERR525841 | 4 | 40102129 | 40100769 | 17665878 | 37265 | 789539 |
| 332 | ERR525845 | 4 | 22987886 | 22987556 | 13784211 | 13610 | 25399  |
| 335 | ERR525849 | 4 | 18721524 | 18721154 | 10216750 | 22285 | 19169  |
| 338 | ERR525853 | 4 | 14973436 | 14964017 | 6995474  | 13761 | 43250  |
| 341 | ERR525857 | 4 | 17175377 | 17175273 | 10304395 | 15986 | 34311  |
| 343 | ERR525861 | 4 | 23176026 | 23175801 | 14771318 | 16599 | 51387  |
| 345 | ERR525865 | 4 | 20695891 | 20695568 | 9987230  | 20741 | 3666   |
| 350 | ERR525869 | 4 | 21510512 | 21509385 | 13738856 | 21935 | 71875  |

|     |           |   |          |          |          |       |        |
|-----|-----------|---|----------|----------|----------|-------|--------|
| 367 | ERR525873 | 4 | 21016509 | 21014215 | 8474472  | 17804 | 30408  |
| 377 | ERR525877 | 4 | 20603169 | 20602955 | 11498568 | 22920 | 439031 |
| 383 | ERR525882 | 4 | 20920669 | 20920324 | 11567310 | 11931 | 169178 |
| 385 | ERR525887 | 4 | 15540860 | 15514827 | 3893391  | 10031 | 22580  |
| 387 | ERR525891 | 4 | 19208410 | 19206184 | 6620312  | 16435 | 214669 |
| 397 | ERR525899 | 4 | 21836384 | 21835316 | 9571950  | 19529 | 193381 |
| 503 | ERR525913 | 4 | 21725058 | 21723105 | 12567917 | 22739 | 229100 |
| 504 | ERR525917 | 4 | 18795997 | 18795444 | 11743009 | 21956 | 220361 |
| 507 | ERR525921 | 4 | 22694224 | 22693855 | 13558992 | 25945 | 56900  |
| 511 | ERR525926 | 4 | 25827701 | 25827125 | 17423051 | 22198 | 14207  |
| 521 | ERR525933 | 4 | 24052264 | 24051991 | 16104394 | 19280 | 52700  |
| 526 | ERR525937 | 4 | 19814600 | 19814519 | 10394341 | 19179 | 10480  |
| 527 | ERR525941 | 4 | 22132147 | 22130183 | 11638240 | 17291 | 82630  |
| 532 | ERR525946 | 4 | 28205978 | 28205424 | 19747614 | 38405 | 62268  |
| 536 | ERR525951 | 4 | 19182588 | 19181722 | 7321519  | 13830 | 141796 |
| 544 | ERR525957 | 4 | 24580719 | 24571411 | 13407706 | 19905 | 51131  |
| 546 | ERR525961 | 4 | 23901614 | 23901023 | 11682278 | 14118 | 141195 |
| 549 | ERR525965 | 4 | 21654153 | 21652456 | 11891021 | 17750 | 452589 |
| 560 | ERR525969 | 4 | 16904970 | 16901177 | 5336046  | 7893  | 155531 |
| 565 | ERR525973 | 4 | 20317065 | 20317011 | 9842102  | 10589 | 7076   |
| 566 | ERR525977 | 4 | 16829140 | 16828464 | 5481597  | 14185 | 132358 |
| 567 | ERR525981 | 4 | 16291823 | 16291019 | 6137067  | 10264 | 114007 |
| 570 | ERR525985 | 4 | 22431839 | 22431691 | 11858854 | 10240 | 8199   |
| 572 | ERR525989 | 4 | 18505696 | 18494607 | 8306002  | 9273  | 186716 |
| 577 | ERR525993 | 4 | 24807919 | 24807822 | 14577389 | 7086  | 23915  |
| 582 | ERR525997 | 4 | 20079441 | 20079370 | 11167056 | 16982 | 15837  |
| 585 | ERR526001 | 4 | 15888603 | 15888573 | 4666937  | 10587 | 462    |
| 587 | ERR526005 | 4 | 24951100 | 24948246 | 15713391 | 21154 | 40845  |
| 589 | ERR526009 | 4 | 24511117 | 24509536 | 16542846 | 14167 | 11532  |
| 590 | ERR526013 | 4 | 21984137 | 21983641 | 13355506 | 17927 | 9531   |

|     |           |    |          |          |          |       |        |
|-----|-----------|----|----------|----------|----------|-------|--------|
| 591 | ERR526017 | 4  | 19243196 | 19243117 | 9933453  | 11562 | 13078  |
| 598 | ERR526021 | 4  | 19352743 | 19352378 | 10333686 | 11200 | 80951  |
| 599 | ERR526025 | 4  | 4851194  | 4252552  | 1101234  | 3213  | 2212   |
| 608 | ERR526029 | 4  | 17555367 | 17554837 | 8934027  | 22286 | 3985   |
| 615 | ERR526033 | 4  | 14404982 | 14404823 | 6689290  | 13875 | 46563  |
| 622 | ERR526037 | 4  | 12941365 | 12941152 | 5067706  | 14251 | 11048  |
| 624 | ERR526041 | 4  | 17966980 | 17963481 | 13362894 | 25511 | 132413 |
| 626 | ERR526045 | 4  | 16671736 | 16671594 | 9947420  | 20002 | 42328  |
| 633 | ERR526049 | 4  | 17434745 | 17423546 | 5081769  | 8573  | 91581  |
| 635 | ERR526053 | 4  | 19007307 | 19006645 | 8498496  | 26810 | 76377  |
| 637 | ERR526057 | 4  | 20970481 | 20970290 | 11112983 | 21201 | 39980  |
| 640 | ERR526061 | 4  | 18784037 | 18783374 | 9165379  | 13128 | 22210  |
| 1   | ERR525700 | 12 | 28321904 | 28321728 | 18218009 | 17514 | 38203  |
| 7   | ERR526068 | 12 | 18026372 | 18026156 | 11052593 | 16928 | 11435  |
| 9   | ERR526084 | 12 | 25993558 | 25991010 | 15338747 | 20453 | 172137 |
| 10  | ERR525688 | 12 | 22028790 | 22028621 | 13203373 | 19980 | 9114   |
| 12  | ERR525701 | 12 | 17326678 | 17326540 | 11021694 | 13042 | 14438  |
| 18  | ERR525743 | 12 | 17188228 | 17187662 | 10244666 | 12217 | 14241  |
| 26  | ERR525800 | 12 | 22809092 | 22808684 | 13087690 | 18548 | 8489   |
| 38  | ERR525880 | 12 | 20725008 | 20724796 | 10947454 | 17965 | 23639  |
| 39  | ERR525896 | 12 | 25375033 | 25374783 | 13552887 | 17832 | 14298  |
| 42  | ERR525904 | 12 | 24638741 | 24638600 | 11901578 | 16307 | 19938  |
| 45  | ERR525908 | 12 | 17609422 | 17609250 | 9233467  | 14709 | 20443  |
| 51  | ERR525925 | 12 | 23497887 | 23497682 | 13448728 | 20057 | 19040  |
| 53  | ERR525944 | 12 | 23640240 | 23639895 | 13704685 | 22122 | 98940  |
| 70  | ERR526064 | 12 | 27541520 | 27541007 | 16469725 | 24603 | 28552  |
| 78  | ERR526070 | 12 | 25595188 | 25594607 | 14531720 | 19826 | 12543  |
| 82  | ERR526076 | 12 | 21230391 | 21229971 | 13593758 | 15925 | 3101   |
| 87  | ERR526080 | 12 | 19199619 | 19198915 | 9349971  | 14654 | 13403  |
| 103 | ERR525689 | 12 | 19454303 | 19453539 | 8798851  | 16463 | 13337  |

|     |           |    |          |          |          |       |        |
|-----|-----------|----|----------|----------|----------|-------|--------|
| 105 | ERR525694 | 12 | 24033243 | 24025570 | 13856052 | 19175 | 21394  |
| 128 | ERR525703 | 12 | 22596350 | 22595798 | 13266919 | 20064 | 13634  |
| 130 | ERR525709 | 12 | 30170884 | 30170399 | 18763296 | 29164 | 158048 |
| 133 | ERR525713 | 12 | 20682884 | 20682375 | 12204298 | 18045 | 16240  |
| 137 | ERR525717 | 12 | 23732648 | 23731569 | 14951280 | 21992 | 91734  |
| 150 | ERR525722 | 12 | 22891728 | 22891522 | 16246375 | 21953 | 13185  |
| 157 | ERR525726 | 12 | 22820000 | 22819352 | 15460885 | 18161 | 14550  |
| 172 | ERR525730 | 12 | 20208215 | 20207848 | 13172505 | 18547 | 15646  |
| 179 | ERR525734 | 12 | 23712408 | 23712246 | 15519602 | 17850 | 14925  |
| 180 | ERR525738 | 12 | 21184891 | 21184690 | 12729702 | 20002 | 32135  |
| 181 | ERR525742 | 12 | 19986731 | 19986546 | 13754578 | 15609 | 14743  |
| 184 | ERR525747 | 12 | 19874881 | 19874283 | 9671227  | 12847 | 9867   |
| 195 | ERR525754 | 12 | 23403029 | 23401203 | 12958857 | 19941 | 25437  |
| 201 | ERR525760 | 12 | 14478555 | 14478409 | 7282092  | 9151  | 14624  |
| 203 | ERR525764 | 12 | 14151631 | 14151498 | 8112341  | 8278  | 15660  |
| 224 | ERR525768 | 12 | 22649046 | 22648760 | 12398925 | 12237 | 34397  |
| 229 | ERR525772 | 12 | 25836375 | 25834953 | 15382536 | 17702 | 21493  |
| 238 | ERR525776 | 12 | 9659590  | 9659451  | 5369354  | 7175  | 8211   |
| 240 | ERR525780 | 12 | 10767887 | 10767807 | 4313893  | 6167  | 9542   |
| 241 | ERR525784 | 12 | 22062926 | 22062501 | 9124377  | 11326 | 18408  |
| 244 | ERR525788 | 12 | 20056630 | 20055925 | 7943174  | 11186 | 21130  |
| 256 | ERR525792 | 12 | 18500507 | 18500358 | 6523449  | 9135  | 18700  |
| 258 | ERR525796 | 12 | 22459374 | 22458685 | 10246664 | 10637 | 4799   |
| 263 | ERR525801 | 12 | 21928159 | 21927947 | 9592804  | 9280  | 13053  |
| 265 | ERR525806 | 12 | 16056041 | 16055826 | 7066127  | 7135  | 22124  |
| 268 | ERR525810 | 12 | 27189033 | 27188341 | 19529465 | 34015 | 10884  |
| 272 | ERR525816 | 12 | 23217659 | 23216854 | 17181731 | 32932 | 8156   |
| 274 | ERR525820 | 12 | 20713740 | 20713670 | 14876782 | 20555 | 7869   |
| 275 | ERR525824 | 12 | 21090996 | 21090031 | 12373407 | 20477 | 5693   |
| 276 | ERR525828 | 12 | 21894440 | 21894323 | 15770466 | 28317 | 6165   |

|     |           |    |          |          |          |       |        |
|-----|-----------|----|----------|----------|----------|-------|--------|
| 281 | ERR525832 | 12 | 17696651 | 17695240 | 10289913 | 11385 | 24843  |
| 282 | ERR525836 | 12 | 19696964 | 19696851 | 14331162 | 20029 | 15737  |
| 326 | ERR525840 | 12 | 20104441 | 20104205 | 13000922 | 39937 | 42439  |
| 332 | ERR525844 | 12 | 21258771 | 21258415 | 13029739 | 15442 | 18404  |
| 335 | ERR525848 | 12 | 20586920 | 20586837 | 15192783 | 21973 | 23279  |
| 338 | ERR525852 | 12 | 20024287 | 20024095 | 12874205 | 16237 | 11533  |
| 341 | ERR525856 | 12 | 30093707 | 30093546 | 21128182 | 23566 | 6254   |
| 343 | ERR525860 | 12 | 23892230 | 23892153 | 16664743 | 17328 | 18251  |
| 345 | ERR525864 | 12 | 20243857 | 20243788 | 13372149 | 17642 | 17506  |
| 350 | ERR525868 | 12 | 27443227 | 27442784 | 17586229 | 22814 | 14980  |
| 367 | ERR525872 | 12 | 24416912 | 24416792 | 13019541 | 12337 | 23201  |
| 377 | ERR525876 | 12 | 25805022 | 25804799 | 17056473 | 18111 | 23056  |
| 383 | ERR525881 | 12 | 21288339 | 21288173 | 12587303 | 15270 | 11403  |
| 385 | ERR525886 | 12 | 21239299 | 21236865 | 12856591 | 27164 | 12334  |
| 387 | ERR525890 | 12 | 23822706 | 23822321 | 14691816 | 10669 | 11838  |
| 397 | ERR525898 | 12 | 25931829 | 25931454 | 17850368 | 28106 | 25446  |
| 503 | ERR525912 | 12 | 25916694 | 25916576 | 16636150 | 29615 | 6766   |
| 504 | ERR525916 | 12 | 21198122 | 21197898 | 12462626 | 25344 | 32030  |
| 507 | ERR525920 | 12 | 20418847 | 20372104 | 12482863 | 30012 | 35456  |
| 511 | ERR525924 | 12 | 26358742 | 26358520 | 17963107 | 26128 | 11498  |
| 521 | ERR525932 | 12 | 21346305 | 21346039 | 13716890 | 20156 | 254343 |
| 526 | ERR525936 | 12 | 28566343 | 28565450 | 19389213 | 32991 | 33547  |
| 527 | ERR525940 | 12 | 24571976 | 24571849 | 14429311 | 18994 | 20308  |
| 532 | ERR525945 | 12 | 22050125 | 22049931 | 10292944 | 8069  | 13509  |
| 536 | ERR525950 | 12 | 22672541 | 22672403 | 13890196 | 17734 | 6250   |
| 544 | ERR525956 | 12 | 18833744 | 18833607 | 9466730  | 12392 | 12291  |
| 546 | ERR525960 | 12 | 23563522 | 23560724 | 12455634 | 13653 | 60666  |
| 549 | ERR525964 | 12 | 20848748 | 20848437 | 13051919 | 18068 | 19522  |
| 560 | ERR525968 | 12 | 24380091 | 24379991 | 13171797 | 11779 | 33744  |
| 565 | ERR525972 | 12 | 19159905 | 19159732 | 10683977 | 12029 | 10812  |

|     |           |    |          |          |          |       |       |
|-----|-----------|----|----------|----------|----------|-------|-------|
| 566 | ERR525976 | 12 | 20384401 | 20383835 | 13100563 | 29087 | 13092 |
| 567 | ERR525980 | 12 | 20117599 | 20117462 | 9486354  | 12048 | 32761 |
| 570 | ERR525984 | 12 | 21123753 | 21123455 | 11580462 | 10913 | 6698  |
| 572 | ERR525988 | 12 | 19971035 | 19969828 | 10733711 | 11647 | 14230 |
| 577 | ERR525992 | 12 | 19747178 | 19745468 | 11465382 | 22928 | 31369 |
| 582 | ERR525996 | 12 | 19018644 | 19018318 | 12773102 | 20609 | 10947 |
| 585 | ERR526000 | 12 | 22984277 | 22983443 | 13910937 | 25643 | 13068 |
| 587 | ERR526004 | 12 | 25346535 | 25344984 | 17226019 | 19025 | 24882 |
| 589 | ERR526008 | 12 | 23108605 | 23105273 | 15614034 | 26488 | 14523 |
| 590 | ERR526012 | 12 | 24829138 | 24828441 | 14549049 | 17246 | 13457 |
| 591 | ERR526016 | 12 | 27298560 | 27297661 | 16053899 | 14308 | 16804 |
| 598 | ERR526020 | 12 | 18638157 | 18638004 | 10353662 | 14717 | 10352 |
| 599 | ERR526024 | 12 | 14341675 | 14339493 | 10731332 | 27252 | 26813 |
| 608 | ERR526028 | 12 | 16474049 | 16473381 | 10351670 | 18310 | 82465 |
| 615 | ERR526032 | 12 | 10993609 | 10993445 | 7741369  | 16438 | 7566  |
| 622 | ERR526036 | 12 | 13531425 | 13531246 | 10168130 | 16240 | 2439  |
| 624 | ERR526040 | 12 | 17967179 | 17966746 | 13641519 | 22453 | 30212 |
| 626 | ERR526044 | 12 | 15557149 | 15556769 | 10864833 | 14031 | 3293  |
| 633 | ERR526048 | 12 | 19638485 | 19634340 | 7328782  | 12874 | 31574 |
| 635 | ERR526052 | 12 | 17853944 | 17853836 | 12933561 | 19303 | 8281  |
| 637 | ERR526056 | 12 | 28625656 | 28625415 | 15146213 | 16867 | 67728 |
| 640 | ERR526060 | 12 | 20330013 | 20329955 | 9708052  | 9346  | 20649 |

**Supplemental Table S4**
