# Supplementary material for: Bifidobacterial Dominance of the Gut in Early Life and Acquisition of Antimicrobial Resistance
Source: PubMed Central journal article supplement (PMC6158511; doi:10.1128/msphere.00441-18), 2018-09-26
Supplement: sph005182646st5.pdf [file sph005182646st5.pdf]

| Database Level | AMR Class, Mechanism, or Group Value                             | Median normalized abundance in high <i>Bifidobacterium</i> samples (range) | Median normalized abundance in low <i>Bifidobacterium</i> samples (range) | Kruskal-Wallis test p-value |
|----------------|------------------------------------------------------------------|----------------------------------------------------------------------------|---------------------------------------------------------------------------|-----------------------------|
| Class          | Tetracyclines                                                    | 0.0467 (0 – 0.815)                                                         | 0.522 (0 – 2.51)                                                          | 0.000709                    |
| Mechanism      | Class A Betalactamases (Class Betalactamases)                    | 0 (0 – 0.401)                                                              | 0.242 (0 – 1.14)                                                          | 0.000347                    |
| Mechanism      | Tetracycline Resistance Ribosomal Proteins (Class Tetracyclines) | 0.0123 (0 – 0.815)                                                         | 0.444 (0 – 2.05)                                                          | 0.000153                    |
| Group          | TETQ (Class Tetracyclines)                                       | 0 (0 – 0.0455)                                                             | 0.343 (0 – 2.05)                                                          | 0.0000467                   |

**Supplemental Table S5**
